# Supplementary material for: A neuromechanics-based powered ankle exoskeleton to assist walking post-stroke: a feasibility study
Source: Springer Nature journal article supplement (doi:10.1186/s12984-015-0015-7), 2015-01-01
Supplement: MOESM2 [file 9769708]

## Summary of GRF and Spatiotemporal Data

|                                                                 | NoEXO             | UnPOW             | POWx1             | POWx2             | POWx3             |
|-----------------------------------------------------------------|-------------------|-------------------|-------------------|-------------------|-------------------|
|                                                                 | Mean +/- Std      | Mean +/- Std      | Mean +/- Std      | Mean +/- Std      | Mean +/- Std      |
| <b>Propulsion Impulse: Non Paretic (BW*sec)</b>                 | 0.0283 +/- 0.0049 | 0.0287 +/- 0.0054 | 0.0278 +/- 0.0054 | 0.0272 +/- 0.0030 | 0.0272 +/- 0.0056 |
| <b>Propulsion Impulse: Paretic (BW*sec)</b>                     | 0.0108 +/- 0.0053 | 0.0096 +/- 0.0056 | 0.0101 +/- 0.0052 | 0.0119 +/- 0.0059 | 0.0111 +/- 0.0052 |
| <b>Propulsion Peak: Non Paretic (BW)</b>                        | 0.113 +/- 0.037   | 0.111 +/- 0.038   | 0.110 +/- 0.037   | 0.107 +/- 0.035   | 0.105 +/- 0.030   |
| <b>Propulsion Peak: Paretic (BW)</b>                            | 0.047 +/- 0.018   | 0.047 +/- 0.024   | 0.047 +/- 0.020   | 0.051 +/- 0.022   | 0.052 +/- 0.024   |
| <b>Braking Impulse: Non Paretic (BW*sec)</b>                    | -0.014 +/- 0.005  | -0.013 +/- 0.004  | -0.013 +/- 0.004  | -0.014 +/- 0.005  | -0.014 +/- 0.005  |
| <b>Braking Impulse: Paretic (BW*sec)</b>                        | -0.024 +/- 0.006  | -0.024 +/- 0.007  | -0.024 +/- 0.006  | -0.024 +/- 0.006  | -0.024 +/- 0.006  |
| <b>Braking Peak: Non Paretic (BW)</b>                           | -0.078 +/- 0.027  | -0.075 +/- 0.023  | -0.073 +/- 0.023  | -0.074 +/- 0.024  | -0.075 +/- 0.024  |
| <b>Braking Peak: Paretic (BW)</b>                               | -0.118 +/- 0.049  | -0.107 +/- 0.043  | -0.110 +/- 0.037  | -0.109 +/- 0.037  | -0.106 +/- 0.035  |
| <b>Vertical Impulse: Non Paretic entire stance (BW*sec)</b>     | 0.775 +/- 0.174   | 0.785 +/- 0.163   | 0.784 +/- 0.177   | 0.800 +/- 0.189   | 0.801 +/- 0.185   |
| <b>Vertical Impulse: Paretic (BW*sec)</b>                       | 0.626 +/- 0.187   | 0.639 +/- 0.175   | 0.644 +/- 0.183   | 0.658 +/- 0.174   | 0.644 +/- 0.160   |
| <b>Vertical Impulse: Non Paretic during propulsion (BW*sec)</b> | 0.437 +/- 0.119   | 0.453 +/- 0.162   | 0.432 +/- 0.125   | 0.455 +/- 0.149   | 0.439 +/- 0.139   |
| <b>Vertical Impulse: Paretic during propulsion (BW*sec)</b>     | 0.273 +/- 0.072   | 0.269 +/- 0.073   | 0.298 +/- 0.090   | 0.303 +/- 0.085   | 0.292 +/- 0.078   |
| <b>Vertical Peak (1st): Non Paretic (BW)</b>                    | 0.967 +/- 0.053   | 0.982 +/- 0.041   | 0.990 +/- 0.044   | 0.989 +/- 0.036   | 0.994 +/- 0.035   |
| <b>Vertical Peak (1st): Paretic (BW)</b>                        | 1.010 +/- 0.033   | 1.017 +/- 0.050   | 1.012 +/- 0.064   | 0.999 +/- 0.072   | 1.005 +/- 0.068   |
| <b>Vertical Peak (2nd): Non Paretic (BW)</b>                    | 0.997 +/- 0.019   | 1.005 +/- 0.020   | 0.990 +/- 0.018   | 0.994 +/- 0.027   | 1.002 +/- 0.022   |
| <b>Vertical Peak (2nd): Paretic (BW)</b>                        | 0.938 +/- 0.079   | 0.952 +/- 0.069   | 0.977 +/- 0.044   | 0.963 +/- 0.055   | 0.961 +/- 0.030   |
| <b>Stance Time: Non Paretic (sec)</b>                           | 1.022 +/- 0.270   | 1.036 +/- 0.251   | 1.040 +/- 0.272   | 1.060 +/- 0.2774  | 1.061 +/- 0.257   |
| <b>Stance Time: Paretic (sec)</b>                               | 0.913 +/- 0.343   | 0.937 +/- 0.320   | 0.931 +/- 0.336   | 0.962 +/- 0.3278  | 0.945 +/- 0.302   |
| <b>Step Length: Non Paretic (m)</b>                             | 0.352 +/- 0.080   | 0.367 +/- 0.082   | 0.370 +/- 0.078   | 0.390 +/- 0.089   | 0.385 +/- 0.083   |
| <b>Step Length: Paretic (m)</b>                                 | 0.454 +/- 0.034   | 0.451 +/- 0.055   | 0.449 +/- 0.050   | 0.450 +/- 0.049   | 0.447 +/- 0.053   |
| <b>Swing Time: Non Paretic (sec)</b>                            | 0.385 +/- 0.117   | 0.384 +/- 0.106   | 0.392 +/- 0.117   | 0.404 +/- 0.113   | 0.385 +/- 0.122   |
| <b>Swing Time: Paretic (sec)</b>                                | 0.492 +/- 0.084   | 0.491 +/- 0.074   | 0.499 +/- 0.084   | 0.498 +/- 0.084   | 0.503 +/- 0.096   |
| <b>Stride Frequency: (strides min<sup>-1</sup>)</b>             | 44.85 +/- 10.07   | 44.12 +/- 10.09   | 44.25 +/- 10.92   | 43.45 +/- 11.37   | 43.91 +/- 12.04   |
