# Supplementary material for: A neuromechanics-based powered ankle exoskeleton to assist walking post-stroke: a feasibility study
Source: Springer Nature journal article supplement (doi:10.1186/s12984-015-0015-7), 2015-01-01

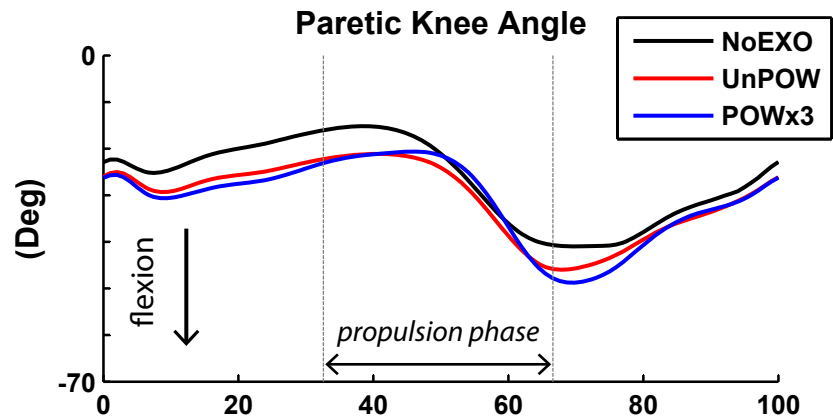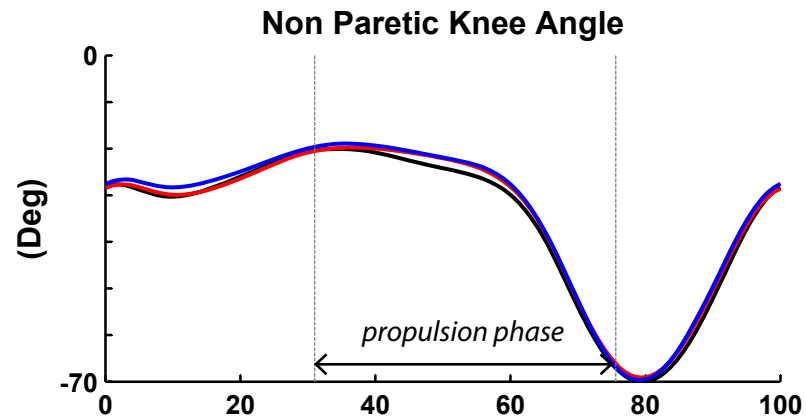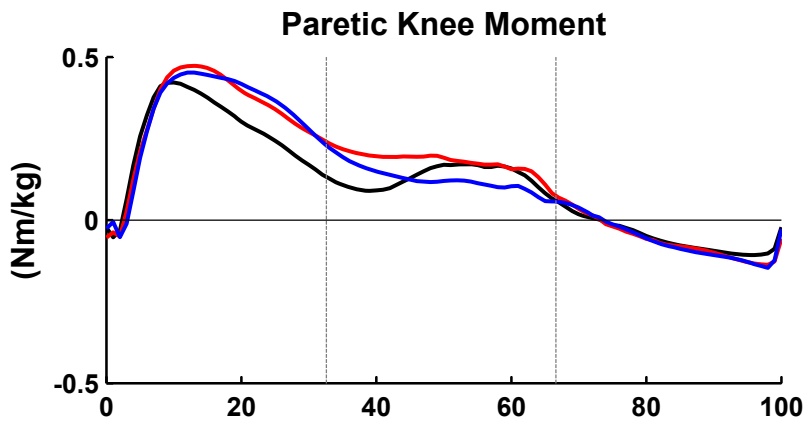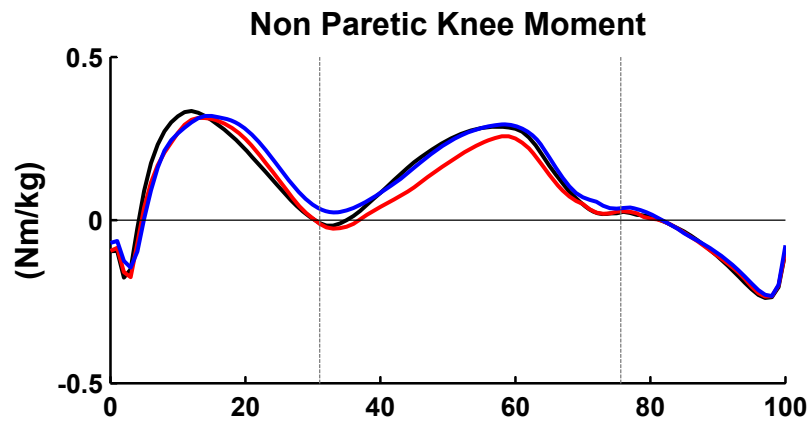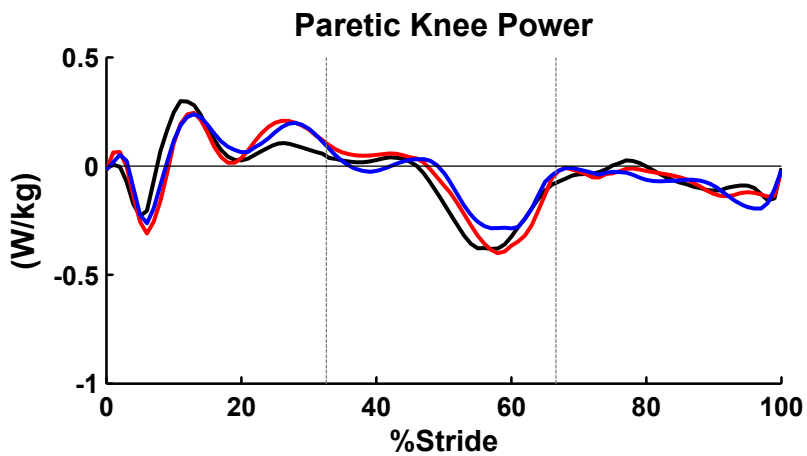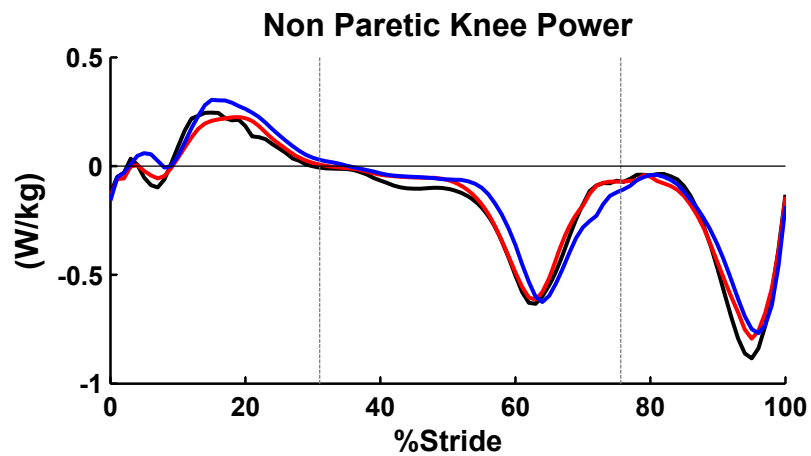

Supplement: MOESM3 [file 9769708]
