# Supplementary material for: A neuromechanics-based powered ankle exoskeleton to assist walking post-stroke: a feasibility study
Source: Springer Nature journal article supplement (doi:10.1186/s12984-015-0015-7), 2015-01-01

**Paretic Hip Angle**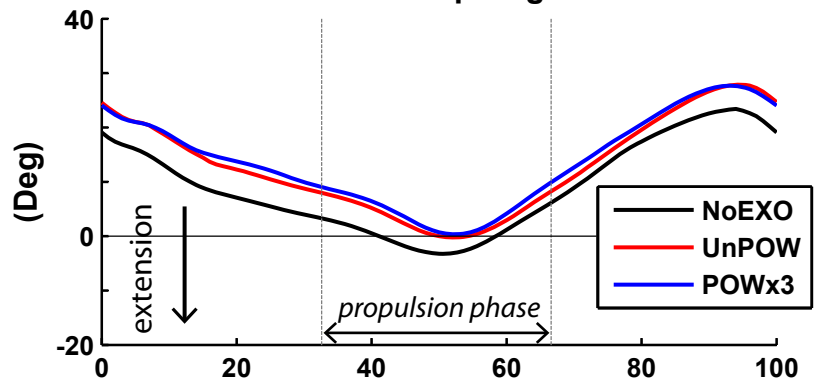**Non Paretic Hip Angle**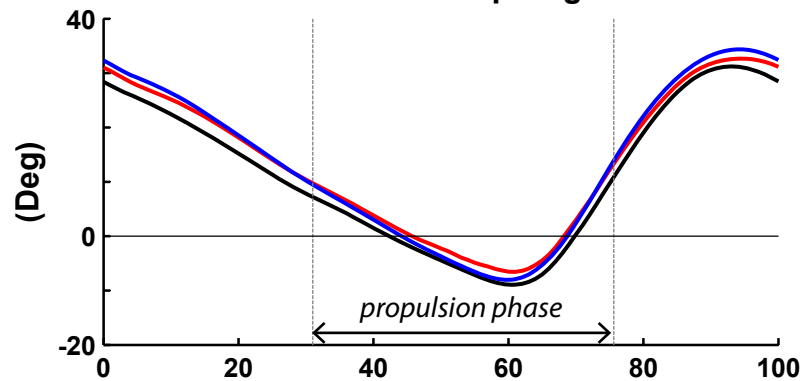**Paretic Hip Moment**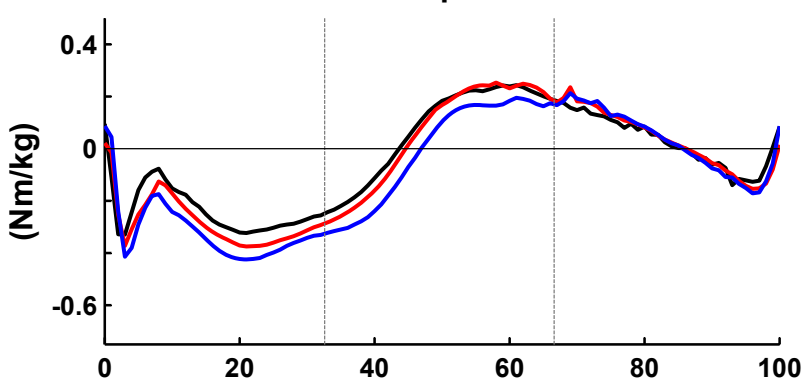**Non Paretic Hip Moment**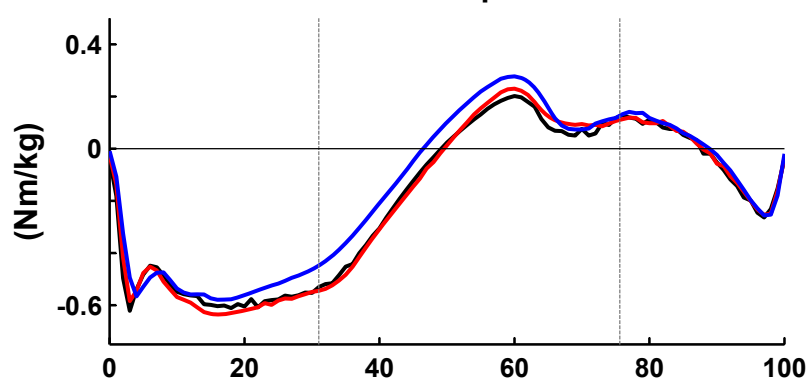**Paretic Hip Power**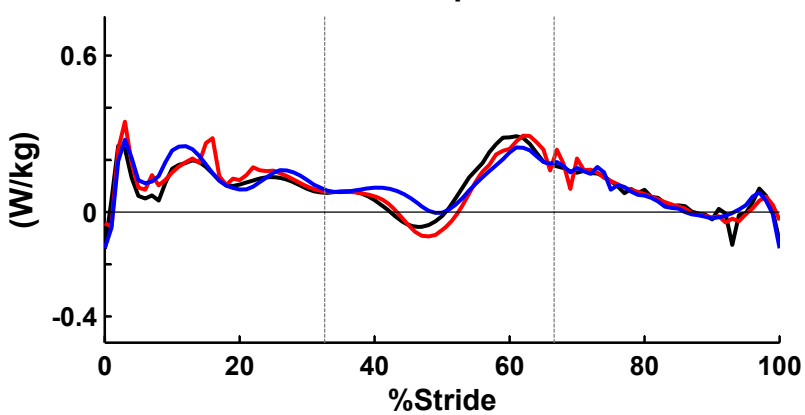**Non Paretic Hip Power**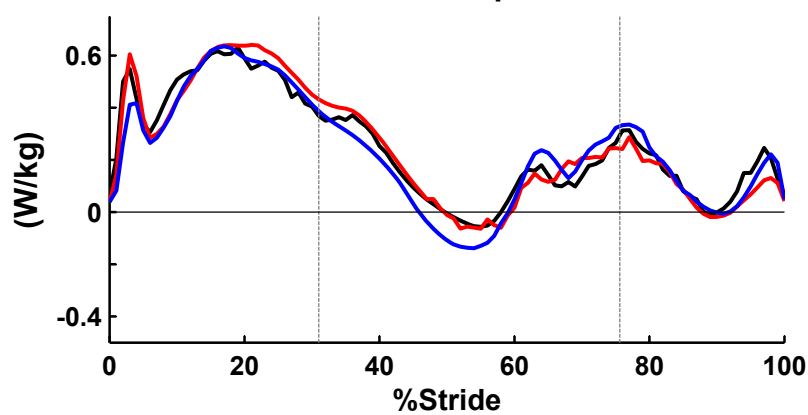

Supplement: MOESM4 [file 9769708]
