# Supplementary material for: A neuromechanics-based powered ankle exoskeleton to assist walking post-stroke: a feasibility study
Source: Springer Nature journal article supplement (doi:10.1186/s12984-015-0015-7), 2015-01-01
Supplement: MOESM5 [file 9769708]

## Summary of Joint Mechanics

|                                                       | NoEXO      |       | UnPOW      |       | POWx1      |        | POWx2      |        | POWx3      |        |
|-------------------------------------------------------|------------|-------|------------|-------|------------|--------|------------|--------|------------|--------|
|                                                       | Mean +/-   | Std   | Mean +/-   | Std   | Mean +/-   | Std    | Mean +/-   | Std    | Mean +/-   | Std    |
| Peak Ankle Moment Non Paretic (Nm kg <sup>-1</sup> )  | -1.405 +/- | 0.137 | -1.412 +/- | 0.169 | -1.405 +/- | 0.1552 | -1.403 +/- | 0.1548 | -1.401 +/- | 0.1781 |
| Peak Ankle Moment Paretic (Nm kg <sup>-1</sup> )      | -0.957 +/- | 0.321 | -1.037 +/- | 0.252 | -1.109 +/- | 0.3196 | -1.123 +/- | 0.2909 | -1.111 +/- | 0.3145 |
| Peak EXO Moment (Nm kg <sup>-1</sup> )                | 0.000 +/-  | 0.000 | -0.021 +/- | 0.015 | -0.253 +/- | 0.0796 | -0.224 +/- | 0.0523 | -0.240 +/- | 0.0490 |
| Peak Ankle Power Non Paretic (W kg <sup>-1</sup> )    | 2.165 +/-  | 1.190 | 2.137 +/-  | 1.157 | 2.145 +/-  | 1.1038 | 2.112 +/-  | 1.1381 | 2.029 +/-  | 1.0080 |
| Peak Ankle Power Paretic (W kg <sup>-1</sup> )        | 0.668 +/-  | 0.277 | 0.651 +/-  | 0.222 | 0.704 +/-  | 0.4301 | 0.717 +/-  | 0.3888 | 0.730 +/-  | 0.3817 |
| Peak EXO Power (W kg <sup>-1</sup> )                  | 0.000 +/-  | 0.000 | 0.012 +/-  | 0.009 | 0.189 +/-  | 0.1519 | 0.141 +/-  | 0.0620 | 0.185 +/-  | 0.0858 |
| Ankle Positive Work Non Paretic (J kg <sup>-1</sup> ) | 0.210 +/-  | 0.066 | 0.208 +/-  | 0.064 | 0.209 +/-  | 0.0613 | 0.206 +/-  | 0.0485 | 0.197 +/-  | 0.0501 |
| Ankle Positive Work Paretic (J kg <sup>-1</sup> )     | 0.081 +/-  | 0.045 | 0.079 +/-  | 0.041 | 0.091 +/-  | 0.0550 | 0.089 +/-  | 0.0548 | 0.090 +/-  | 0.0585 |
| EXO Positive Work (J kg <sup>-1</sup> )               | 0.000 +/-  | 0.000 | 0.002 +/-  | 0.001 | 0.023 +/-  | 0.0180 | 0.018 +/-  | 0.0098 | 0.020 +/-  | 0.0124 |
| Ankle Negative Work Non Paretic (J kg <sup>-1</sup> ) | -0.269 +/- | 0.094 | -0.265 +/- | 0.074 | -0.282 +/- | 0.0966 | -0.298 +/- | 0.0907 | -0.295 +/- | 0.1014 |
| Ankle Negative Work Paretic (J kg <sup>-1</sup> )     | -0.158 +/- | 0.048 | -0.185 +/- | 0.056 | -0.162 +/- | 0.0558 | -0.155 +/- | 0.0463 | -0.161 +/- | 0.0514 |
| EXO Negative Work (J kg <sup>-1</sup> )               | 0.000 +/-  | 0.000 | -0.002 +/- | 0.002 | -0.012 +/- | 0.0094 | -0.009 +/- | 0.0086 | -0.007 +/- | 0.0056 |
| Knee Positive Work Non Paretic (J kg <sup>-1</sup> )  | 0.077 +/-  | 0.048 | 0.076 +/-  | 0.050 | 0.076 +/-  | 0.0607 | 0.086 +/-  | 0.0657 | 0.096 +/-  | 0.0671 |
| Knee Positive Work Paretic (J kg <sup>-1</sup> )      | 0.081 +/-  | 0.054 | 0.085 +/-  | 0.068 | 0.089 +/-  | 0.0667 | 0.089 +/-  | 0.0727 | 0.088 +/-  | 0.0706 |
| Knee Negative Work Non Paretic (J kg <sup>-1</sup> )  | -0.268 +/- | 0.119 | -0.249 +/- | 0.099 | -0.235 +/- | 0.0930 | -0.240 +/- | 0.0952 | -0.241 +/- | 0.0828 |
| Knee Negative Work Paretic (J kg <sup>-1</sup> )      | -0.129 +/- | 0.034 | -0.126 +/- | 0.030 | -0.120 +/- | 0.0242 | -0.116 +/- | 0.0185 | -0.118 +/- | 0.0261 |
| Hip Positive Work Non Paretic (J kg <sup>-1</sup> )   | 0.363 +/-  | 0.097 | 0.368 +/-  | 0.143 | 0.379 +/-  | 0.1393 | 0.398 +/-  | 0.1508 | 0.356 +/-  | 0.1531 |
| Hip Positive Work Paretic (J kg <sup>-1</sup> )       | 0.169 +/-  | 0.101 | 0.178 +/-  | 0.092 | 0.180 +/-  | 0.0803 | 0.193 +/-  | 0.0805 | 0.171 +/-  | 0.0776 |
| Hip Negative Work Non Paretic (J kg <sup>-1</sup> )   | -0.029 +/- | 0.027 | -0.026 +/- | 0.017 | -0.035 +/- | 0.0249 | -0.032 +/- | 0.0237 | -0.037 +/- | 0.0261 |
| Hip Negative Work Paretic (J kg <sup>-1</sup> )       | -0.034 +/- | 0.020 | -0.034 +/- | 0.017 | -0.031 +/- | 0.0208 | -0.030 +/- | 0.0260 | -0.023 +/- | 0.0116 |
